# Supplementary material for: 2D → 3D polycatenated Zn(ii) metal–organic framework with good chemical stability as a fluorescent sensor toward salicylaldehyde, acetylacetone and H2PO4−
Source: Royal Society of Chemistry journal article supplement (doi:10.1039/d3ce00961k), 2023-01-01
Supplement: d3ce00961k1.pdf [file d3ce00961k1.pdf]

## ***Electronic Supplementary Information (ESI)***

**2D → 3D polycatenated Zn(II) metal-organic framework  
with good chemical stability as the fluorescent sensor toward  
salicylaldehyde, acetylacetone and H<sub>2</sub>PO<sub>4</sub><sup>-</sup>**

Ya-Ping Li,<sup>a\*</sup> Jian-Hua Zhang,<sup>a</sup> Xiao-Xia Zhang<sup>a</sup> and Sui-Jun Liu<sup>b\*</sup>

<sup>a</sup>School of Chemistry and Chemical Engineering, Shanxi University, Taiyuan 030006, P.R. China. E-mail: yapingli2007@163.com (Y.-P. Li)

<sup>b</sup>School of Chemistry and Chemical Engineering, Jiangxi Provincial Key Laboratory of Functional Molecular Materials Chemistry, Jiangxi University of Science and Technology, Ganzhou 341000, Jiangxi Province, P.R. China. E-mail: sjliu@jxust.edu.cn (S.-J. Liu)

## Section 1. Experiments

### Synthesis of BBIP

The synthetic route of BBIP is shown in Scheme S1. A mixture of 3,5-dibromopyridine (2.37 g, 10 mmol), benzimidazole (3.54 g, 30 mmol), 1,10-phenanthroline (0.90 g, 5 mmol) and  $K_2CO_3$  (9.95 g, 72 mmol) in the presence of  $CuI$  (0.46 g, 2.4 mmol) as a catalyst was dissolved in 125 mL DMF with a 250 mL flask and refluxed under a  $N_2$  atmosphere for 72 h. After being cooled down to room temperature, 40 mL of distilled water was added to facilitate the workup. The mixture was extracted three times with  $CH_2Cl_2$  (120 mL), then the organic phase was further washed with distilled water and dried with anhydrous  $MgSO_4$ . After the filtration and evaporation, the yellow crude was obtained. Finally, colorless strip crystals of 3,5-bis(1*H*-benzo[d]imidazol-1-yl)pyridine (BBIP) were obtained by recrystallization of the yellow crude in the mixed solvent of  $CH_2Cl_2$  and  $CH_3OH$  with a yield of 50%.  $^1H$  NMR (600 MHz,  $CDCl_3$ ): 9.01 (s, 2H), 8.28 (s, 2H), 8.14 (s, 1H), 7.95-7.96 (t,  $J = 6$  Hz, 5 Hz, 2H), 7.62-7.63 (m, 2H), 7.44 (dd,  $J = 8.9, 5.0$  Hz, 4H).

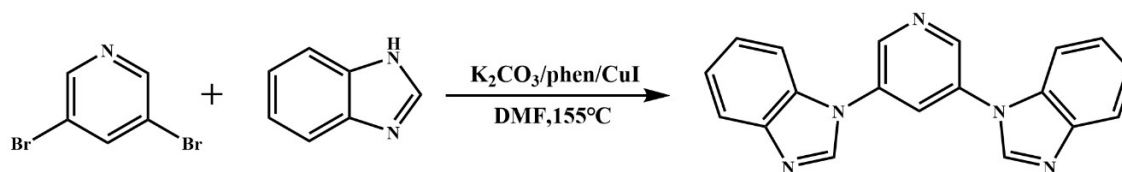

**Scheme S1.** The synthetic route of BBIP

## Section 2. General Characterizations

**Table S1.** Selected bond lengths (Å) and angles (°) for **JXUST-44**<sup>a</sup>

|                         |           |                        |           |
|-------------------------|-----------|------------------------|-----------|
| Zn1—N1 <sup>i</sup>     | 2.045(5)  | Zn1—N3                 | 2.046(5)  |
| Zn1—O5                  | 1.979(12) | Zn1—O1                 | 1.948(12) |
| N1 <sup>i</sup> —Zn1—N3 | 97.42(18) | O5—Zn1—N1 <sup>i</sup> | 110.7(4)  |
| O5—Zn1—N3               | 127.1(4)  | O1—Zn1—N1 <sup>i</sup> | 103.3(4)  |
| O1—Zn1—N3               | 107.4(4)  | O1—Zn1—O5              | 108.2(5)  |

<sup>a</sup>Symmetry code: (i)  $x+1, y, z$ .

**Table S2.** SHAPE analysis of the Zn<sup>II</sup> ion in **JXUST-44**.

| ions | label      | shape                     | symmetry                | Distortion ( $\tau$ ) |
|------|------------|---------------------------|-------------------------|-----------------------|
| Zn1  | SP-4       | Square                    | $D_{4h}$                | 29.001                |
|      | <b>T-4</b> | <b>Tetrahedron</b>        | <b><math>T_d</math></b> | <b>0.949</b>          |
|      | SS-4       | Seesaw                    | $C_{2v}$                | 5.533                 |
|      | vTBPY-4    | Vacant trigonal bipyramid | $C_{3v}$                | 2.688                 |

**Table S3.** Comparison of the sensitivity of **JXUST-44** with previously reported luminescent sensors toward SA and acac.

| Analytes | Materials                                                                                             | type            | LOD           | Reference        |
|----------|-------------------------------------------------------------------------------------------------------|-----------------|---------------|------------------|
| SA       | CDB-Am                                                                                                | turn-on effect  | 0.94 $\mu$ M  | S1               |
|          | $\{[(CH_3)_2NH_2]_{0.7}[Tb_2(BTDBA)_{1.5}(lac)_{0.7}(H_2O)_2] \cdot solvents\}_n$ ( <b>JXUST-19</b> ) | turn-on effect  | 0.19 ppm      | S2               |
|          | $[Cd(BIBT)(3,4-TDC)]_n$ ( <b>JXUST-27</b> )                                                           | turn-off effect | 0.087 $\mu$ M | S3               |
|          | $\{[Cd(BBIP)(TBIP)] \cdot EtOH\}_n$                                                                   | turn-off effect | 0.42 ppm      | S4               |
|          | $\{[(CH_3)_2NH_2][Eu(TCPB)(H_2O)_2] \cdot DMF\}_n$                                                    | turn-off effect | 0.095 ppm     | S5               |
|          | $[Zn(BBIP)(2,6-NDC)]_n$                                                                               | turn-off effect | 0.074 ppm     | <b>This work</b> |
| acac     | $\{[Cd(HL)(bpy)] \cdot 1.25H_2O \cdot 1.5DMF\}_n$ ( <b>LCU-107</b> )                                  | turn-on effect  | 0.136 ppm     | S6               |
|          | $\{[(CH_3)_2NH_2]_5[Tb_5(TBAPy)_5] \cdot solvent\}_n$                                                 | turn-on effect  | 0.129 ppm     | S7               |
|          | $\{[Zn_2(oxdz)_2(tpbn)] \cdot 14H_2O\}_n$                                                             | turn-on effect  | 4 ppm         | S8               |
|          | $[Ni(L)(NPTA) \cdot H_2O]_n$                                                                          | turn-off effect | 0.79 $\mu$ M  | S9               |
|          | $[Cd_2(L_2)_2(DCTP)_2]_n$                                                                             | turn-off effect | 0.636 $\mu$ M | S10              |
|          | $[Zn(BBIP)(2,6-NDC)]_n$                                                                               | turn-on effect  | 0.103 mM      | <b>This work</b> |

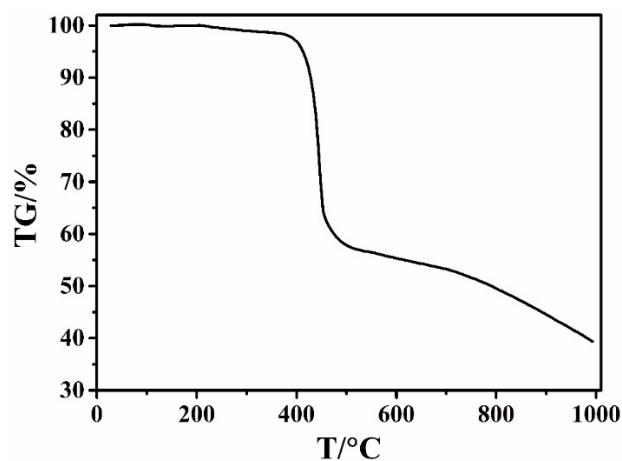

**Fig. S1** The TG curve for **JXUST-44**.

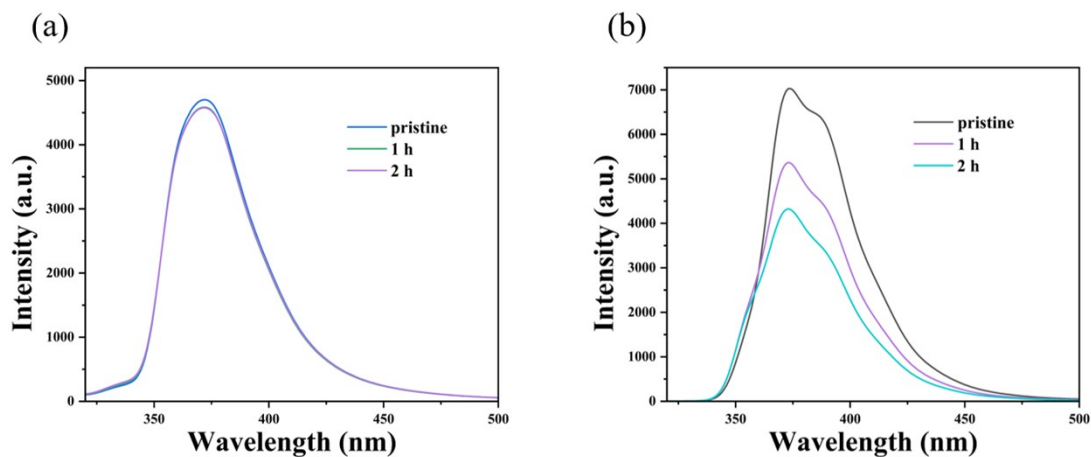

**Fig. S2** Fluorescence stability of **JXUST-44** after soaking in (a) DMF and (b) water for 2 hours.

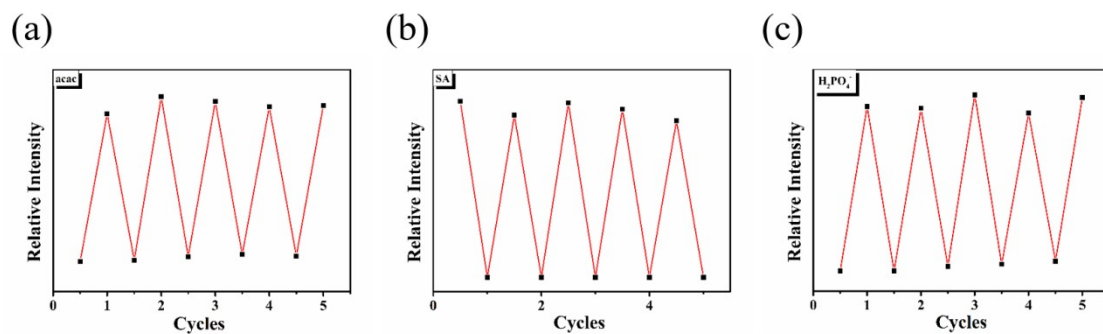

**Fig. S3** Relative fluorescent intensity of **JXUST-44** in five cycles of the sensing experiments toward (a) acac, (b) SA and (c)  $\text{H}_2\text{PO}_4^-$ .

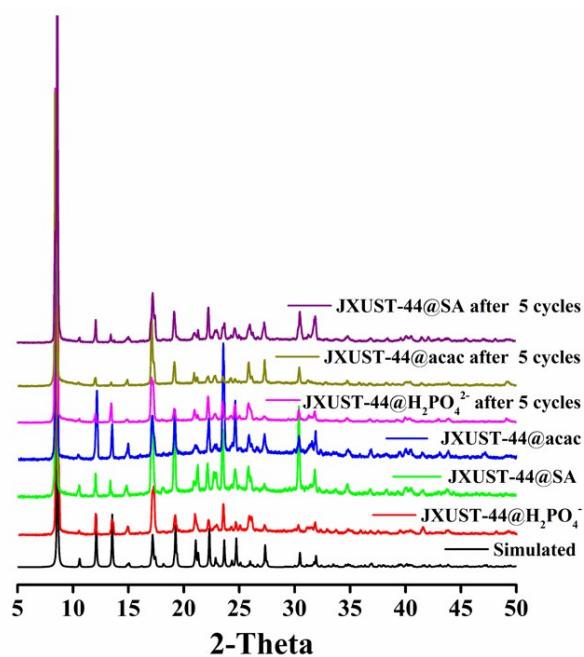

**Fig. S4** The PXRD patterns of **JXUST-44** soaked in DMF solution containing acac/SA/H<sub>2</sub>PO<sub>4</sub><sup>-</sup> for 24 h and acac/SA/H<sub>2</sub>PO<sub>4</sub><sup>-</sup> sensing for five times.

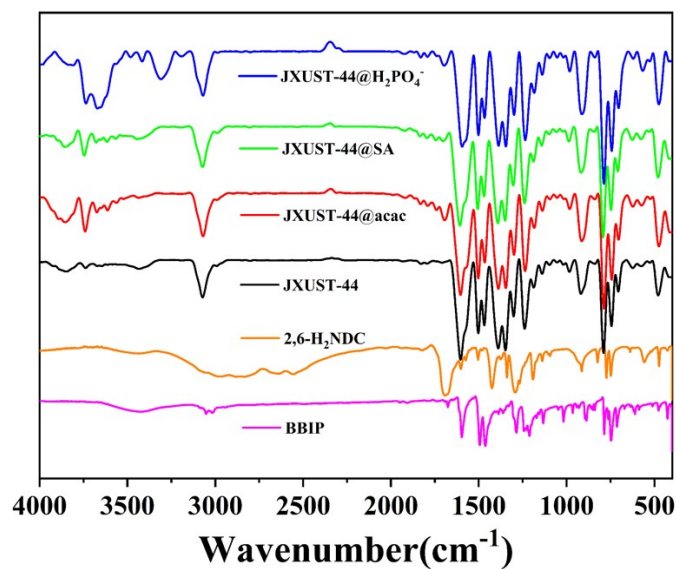

**Fig. S5** The IR spectra of BBIP, 2,6-H<sub>2</sub>NDC, **JXUST-44**, **JXUST-44@acac**, **JXUST-44@SA** and **JXUST-44@H<sub>2</sub>PO<sub>4</sub><sup>-</sup>**.

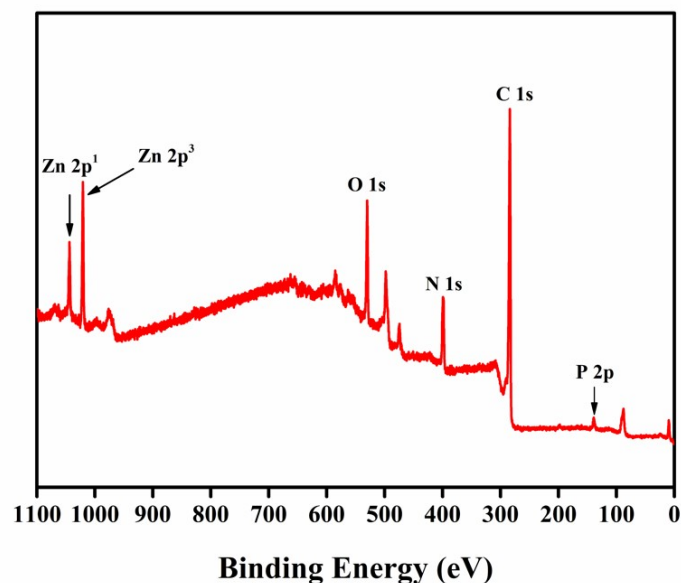

**Fig. S6** The XPS of **JXUST-44** after soaked in DMF solution containing  $\text{H}_2\text{PO}_4^-$ .

## References

- S1 S. B. Chen, S. N. Zheng, S. J. Jiang, H. Y. Guo and F. F. Yang, *Anal Bioanal. Chem.*, 2021, **413**, 1955–1966.
- S2 K. Wang, T. F. Zheng, J. L. Chen, H. R. Wen, S. J. Liu and T. L. Hu, *Inorg. Chem.*, 2022, **61**, 16177–16184.
- S3 X. L. Yan, X. Q. Cao, C. R. Deng, T. F. Zheng, S. L. Yao and S. J. Liu, *CrystEngComm*, 2023, **25**, 2366–2371
- S4 L. H. Wu, S. L. Yao, J. Li, H. Xu, T. F. Zheng, S. J. Liu, J. L. Chen and H. R. Wen, *CrystEngComm*, 2021, **23**, 482–491.
- S5 B. C. Chen, C. Q. Xiao, J. J. Hu, Y. Peng, H. R. Wen and S. J. Liu, *Inorg. Chem.*, 2023, **62**, 6255–6262.
- S6 Y. E. Yu, Y. H. Wang, H. J. Xu, J. Lu, H. W. Wang, D. C. Li, J. M. Dou, Y. W. Li and S. N. Wang, *CrystEngComm*, 2020, **22**, 3759–3767.
- S7 Y. G. Li, J. J. Hu, J. L. Zhang, S. J. Liu, Y. Peng and H. R. Wen, *CrystEngComm*, 2022, **24**, 2464–2471.
- S8 A. Gogia and S. K. Mandal, *ACS Appl. Mater. Interfaces*, 2022, **14**, 16357–16368.
- S9 H. Zhu, C. Han, Y. H. Li and G. H. Cui, *J. Solid State Chem.*, 2020, **282**, 121132.
- S10 Y. S. Shi, D. Liu, L. S. Fu, Y. H. Li and G. Y. Dong, *CrystEngComm*, 2020, **22**, 4079–4093.
